# Supplementary material
Source: PubMed Central journal article supplement (PMC2883945)
Supplement: E10-02-0083_1.pdf [file E10-02-0083_1.pdf]

**Supplemental Table 1.** Effects of Bim1 on microtubule dynamics at 11.5  $\mu\text{M}$  tubulin

|                                    | Bim1 concentration     |                       |                      |                       |
|------------------------------------|------------------------|-----------------------|----------------------|-----------------------|
|                                    | 0 $\mu\text{M}$        | 0.1 $\mu\text{M}$     | 0.5 $\mu\text{M}$    | 1 $\mu\text{M}$       |
| <i>Plus Ends</i>                   |                        |                       |                      |                       |
| MTs/axoneme end                    |                        |                       |                      |                       |
| MT number                          | 2.18 $\pm$ 1.38        | 4.17 $\pm$ 1.54       | 8.09 $\pm$ 1.92      | 8.36 $\pm$ 1.08       |
| MT length                          | 5.46 $\pm$ 2.74 (20)   | 8.13 $\pm$ 3.27 (10)  | 15.19 $\pm$ 1.46 (8) | 18.19 $\pm$ 2.00 (10) |
| MT length/axoneme                  | 11.90 $\pm$ 9.62       | 33.90 $\pm$ 18.51     | 122.9 $\pm$ 31.5     | 152.1 $\pm$ 25.8      |
| Rates ( $\mu\text{m}/\text{min}$ ) |                        |                       |                      |                       |
| Growth                             | 1.87 $\pm$ 0.29 (59)   | 1.98 $\pm$ 0.25 (68)  | 2.56 $\pm$ 0.24 (27) | 2.93 $\pm$ 0.24 (45)  |
| Shrinkage                          | 40.65 $\pm$ 11.18 (23) | 18.65 $\pm$ 5.81 (24) | *                    | *                     |
| Frequencies ( $\text{min}^{-1}$ )  |                        |                       |                      |                       |
| Catastrophe                        | 0.32 $\pm$ 0.06 (26)   | 0.13 $\pm$ 0.03 (24)  | <0.01 (0)            | <0.01 (0)             |
| Rescue                             | <0.28 (0)              | 0.51 $\pm$ 0.25 (4)   | *                    | *                     |
| Total time (min)                   |                        |                       |                      |                       |
| Growth                             | 82.15                  | 181.0                 | 74.5                 | 143.8                 |
| Shrinkage                          | 3.53                   | 7.90                  | 0                    | 0                     |
| Total MT number                    | 89                     | 85                    | 97                   | 144                   |
| <i>Minus Ends</i>                  |                        |                       |                      |                       |
| MTs/axoneme end                    |                        |                       |                      |                       |
| MT number                          | 1.79 $\pm$ 1.06        | 3.43 $\pm$ 2.08       | 7.40 $\pm$ 1.40      | 6.36 $\pm$ 1.57       |
| MT length                          | 2.46 $\pm$ 1.36 (24)   | 4.46 $\pm$ 0.98 (10)  | 7.40 $\pm$ 1.70 (5)  | 9.64 $\pm$ 2.20 (12)  |
| MT length/axoneme                  | 4.40 $\pm$ 3.57        | 15.30 $\pm$ 9.79      | 54.76 $\pm$ 16.30    | 61.31 $\pm$ 20.61     |
| Rates ( $\mu\text{m}/\text{min}$ ) |                        |                       |                      |                       |
| Growth                             | 0.90 $\pm$ 0.21 (43)   | 0.99 $\pm$ 0.21 (57)  | 1.51 $\pm$ 0.22 (24) | 1.61 $\pm$ 0.19 (32)  |
| Shrinkage                          | 49.83 $\pm$ 11.58 (12) | 15.55 $\pm$ 6.16 (11) | *                    | *                     |
| Frequencies ( $\text{min}^{-1}$ )  |                        |                       |                      |                       |
| Catastrophe                        | 0.27 $\pm$ 0.07 (14)   | 0.06 $\pm$ 0.02 (11)  | <0.01 (0)            | <0.01 (0)             |
| Rescue                             | 1.96 $\pm$ 1.39 (2)    | 3.33 $\pm$ 1.36 (6)   | *                    | *                     |
| Total time (min)                   |                        |                       |                      |                       |
| Growth                             | 51.93                  | 193.1                 | 74.18                | 140.4                 |
| Shrinkage                          | 1.17                   | 1.8                   | 0                    | 0                     |
| Total MT number                    | 68                     | 81                    | 75                   | 83                    |

Data are mean  $\pm$  SD. Values in parentheses are the number of events.

\* No catastrophes events were observed, so shrinkage rates and rescue frequencies could not be determined.

**Supplemental Table 2.** Effects of Bik1 on microtubule dynamics at 11.5  $\mu\text{M}$  tubulin

|                                    | Bik1 concentration     |                        |                       |                        |
|------------------------------------|------------------------|------------------------|-----------------------|------------------------|
|                                    | 0 $\mu\text{M}$        | 0.1 $\mu\text{M}$      | 0.5 $\mu\text{M}$     | 1 $\mu\text{M}$        |
| <i>Plus Ends</i>                   |                        |                        |                       |                        |
| MTs/axoneme end                    |                        |                        |                       |                        |
| MT number                          | 2.18 $\pm$ 1.38        | 2.19 $\pm$ 0.85        | 1.84 $\pm$ 1.34       | 1.00 $\pm$ 0.88        |
| MT length                          | 5.46 $\pm$ 2.74 (20)   | 5.01 $\pm$ 1.61 (10)   | 3.68 $\pm$ 2.76 (11)  | 2.98 $\pm$ 1.42 (11)   |
| MT length/axoneme                  | 11.90 $\pm$ 9.62       | 10.97 $\pm$ 5.53       | 6.77 $\pm$ 7.08       | 2.98 $\pm$ 2.98        |
| Rates ( $\mu\text{m}/\text{min}$ ) |                        |                        |                       |                        |
| Growth                             | 1.87 $\pm$ 0.29 (59)   | 1.78 $\pm$ 0.25 (41)   | 1.69 $\pm$ 0.25 (39)  | 1.54 $\pm$ 0.25 (30)   |
| Shrinkage                          | 40.65 $\pm$ 11.18 (23) | 47.72 $\pm$ 12.25 (20) | 33.65 $\pm$ 8.66 (17) | 34.63 $\pm$ 12.21 (18) |
| Frequencies ( $\text{min}^{-1}$ )  |                        |                        |                       |                        |
| Catastrophe                        | 0.32 $\pm$ 0.06 (26)   | 0.36 $\pm$ 0.08 (20)   | 0.38 $\pm$ 0.09 (19)  | 0.44 $\pm$ 0.10 (18)   |
| Rescue                             | <0.28 (0)              | <0.43 (0)              | <0.41 (0)             | 0.43 (1)               |
| Total time (min)                   |                        |                        |                       |                        |
| Growth                             | 82.15                  | 55.68                  | 49.40                 | 40.88                  |
| Shrinkage                          | 3.53                   | 2.30                   | 2.43                  | 2.35                   |
| Total MT number                    | 89                     | 46                     | 41                    | 36                     |
| <i>Minus Ends</i>                  |                        |                        |                       |                        |
| MTs/axoneme end                    |                        |                        |                       |                        |
| MT number                          | 1.79 $\pm$ 1.06        | 1.71 $\pm$ 0.80        | 0.82 $\pm$ 0.78       | 0.42 $\pm$ 0.64        |
| MT length                          | 2.46 $\pm$ 1.36 (24)   | 1.23 $\pm$ 0.61 (6)    | 1.12 $\pm$ 0.51 (5)   | 0.74 $\pm$ 0.15 (5)    |
| MT length/axoneme                  | 4.40 $\pm$ 3.57        | 2.10 $\pm$ 1.43        | 0.92 $\pm$ 0.97       | 0.31 $\pm$ 0.48        |
| Rates ( $\mu\text{m}/\text{min}$ ) |                        |                        |                       |                        |
| Growth                             | 0.90 $\pm$ 0.21 (43)   | 0.84 $\pm$ 0.23 (20)   | 0.72 $\pm$ 0.15 (8)   | 0.51 $\pm$ 0.15 (7)    |
| Shrinkage                          | 49.83 $\pm$ 11.58 (12) | 43.26 $\pm$ 9.02 (7)   | 35.51 $\pm$ 9.99 (4)  | 36.74 $\pm$ 8.62 (5)   |
| Frequencies ( $\text{min}^{-1}$ )  |                        |                        |                       |                        |
| Catastrophe                        | 0.27 $\pm$ 0.07 (14)   | 0.32 $\pm$ 0.12 (7)    | 0.51 $\pm$ 0.25 (4)   | 0.69 $\pm$ 0.31 (5)    |
| Rescue                             | 1.96 $\pm$ 1.39 (2)    | <1.92 (0)              | <4.00 (0)             | <4.50 (0)              |
| Total time (min)                   |                        |                        |                       |                        |
| Growth                             | 51.93                  | 21.90                  | 7.87                  | 7.22                   |
| Shrinkage                          | 1.17                   | 0.52                   | 0.25                  | 0.22                   |
| Total MT number                    | 68                     | 24                     | 14                    | 10                     |

Data are mean  $\pm$  SD. Values in parentheses are the number of events.

**Supplemental Table 3.** Effects of Bik1 on microtubule dynamics at 14.0  $\mu\text{M}$  tubulin

|                                    | Bik1 concentration   |                       |                       |                      |
|------------------------------------|----------------------|-----------------------|-----------------------|----------------------|
|                                    | 0 $\mu\text{M}$      | 0.1 $\mu\text{M}$     | 0.5 $\mu\text{M}$     | 1 $\mu\text{M}$      |
| <i>Plus Ends</i>                   |                      |                       |                       |                      |
| MTs/axoneme end                    |                      |                       |                       |                      |
| MT number                          | 4.08 $\pm$ 1.26      | 2.73 $\pm$ 1.12       | 2.44 $\pm$ 1.21       | 1.93 $\pm$ 0.92      |
| MT length                          | 13.22 $\pm$ 1.81 (6) | 5.17 $\pm$ 1.45 (7)   | 3.68 $\pm$ 1.82 (8)   | 3.72 $\pm$ 1.56 (9)  |
| MT length/axoneme                  |                      |                       |                       |                      |
| Rates ( $\mu\text{m}/\text{min}$ ) |                      |                       |                       |                      |
| Growth                             | 3.07 $\pm$ .21 (22)  | 2.18 $\pm$ 0.22 (22)  | 1.79 $\pm$ .1 (10)    | 1.53 $\pm$ .12 (19)  |
| Shrinkage                          | *                    | 61.51 $\pm$ 16.88 (7) | 41.33 $\pm$ 11.26 (6) | 47.45 $\pm$ 17.9 (6) |
| Frequencies ( $\text{min}^{-1}$ )  |                      |                       |                       |                      |
| Catastrophe                        | <0.03 (0)            | 0.21 $\pm$ 0.07 (9)   | 0.26 $\pm$ 0.1 (7)    | 0.32 $\pm$ 0.11 (8)  |
| Rescue                             | *                    | <1.25 (0)             | <1.03 (0)             | <1.72 (0)            |
| Total time (min)                   |                      |                       |                       |                      |
| Growth                             | 31.75                | 42.02                 | 26.88                 | 24.88                |
| Shrinkage                          | 0.00                 | 0.8                   | 0.97                  | 0.58                 |
| Total MT number                    | 49                   | 41                    | 44                    | 29                   |
| <i>Minus Ends</i>                  |                      |                       |                       |                      |
| MTs/axoneme end                    |                      |                       |                       |                      |
| MT number                          | 3.27 $\pm$ 1.14      | 1.93 $\pm$ 1.53       | 2.07 $\pm$ 1.22       | 1.88 $\pm$ 0.83      |
| MT length                          | 6.79 $\pm$ 2.15 (8)  | 1.94 $\pm$ 0.72 (7)   | 1.81 $\pm$ 0.81 (7)   | 1.24 $\pm$ 0.76 (6)  |
| MT length/axoneme                  |                      |                       |                       |                      |
| Rates ( $\mu\text{m}/\text{min}$ ) |                      |                       |                       |                      |
| Growth                             | 1.93 $\pm$ 0.12 (12) | 1.04 $\pm$ 0.18 (25)  | 0.79 $\pm$ 0.12 (10)  | 0.76 $\pm$ 0.21 (10) |
| Shrinkage                          | *                    | 41.16 $\pm$ 10.91 (5) | 40.75 $\pm$ 3.01 (4)  | 32.49 $\pm$ 8.39 (5) |
| Frequencies ( $\text{min}^{-1}$ )  |                      |                       |                       |                      |
| Catastrophe                        | <0.03 (0)            | 0.20 $\pm$ 0.08 (6)   | 0.28 $\pm$ 0.13 (5)   | 0.37 $\pm$ 0.15 (6)  |
| Rescue                             | *                    | <3.03 (0)             | <3.03 (0)             | 1.36 (1)             |
| Total time (min)                   |                      |                       |                       |                      |
| Growth                             | 29.97                | 22.05                 | 17.82                 | 16.03                |
| Shrinkage                          | 0.00                 | 0.33                  | 0.33                  | 0.73                 |
| Total MT number                    | 36                   | 27                    | 29                    | 15                   |

Data are mean  $\pm$  SD. Values in parentheses are the number of events.

\* No catastrophes events were observed, so shrinkage rates and rescue frequencies could not be determined.

**Supplemental Table 4.** Combined effects of Bim1 and Bik1 on microtubule dynamics at 11.5  $\mu\text{M}$  tubulin

|                                    | [Bik1]<br>0 $\mu\text{M}$ | 0.1 $\mu\text{M}$     | 1.0 $\mu\text{M}$     | 1.0 $\mu\text{M}$    | 1.0 $\mu\text{M}$    |
|------------------------------------|---------------------------|-----------------------|-----------------------|----------------------|----------------------|
|                                    | [Bim1]<br>0 $\mu\text{M}$ | 0.1 $\mu\text{M}$     | 1.0 $\mu\text{M}$     | 0.5 $\mu\text{M}$    | 0.1 $\mu\text{M}$    |
| <i>Plus Ends</i>                   |                           |                       |                       |                      |                      |
| MT length/axoneme                  |                           |                       |                       |                      |                      |
| MT number                          | 2.18 $\pm$ 1.38           | 4.70 $\pm$ 1.70       | 8.44 $\pm$ 2.01       | 5.25 $\pm$ 2.12      | 3.00 $\pm$ 1.48      |
| MT length                          | 5.46 $\pm$ 2.74 (20)      | 9.45 $\pm$ 3.06       | 16.86 $\pm$ 2.38 (25) | 9.32 $\pm$ 2.31 (13) | 5.47 $\pm$ 2.13 (13) |
| MT length/axonem                   | 11.90 $\pm$ 9.62          | 44.42 $\pm$ 21.56     | 142.3 $\pm$ 39.4      | 48.93 $\pm$ 23.18    | 16.41 $\pm$ 10.31    |
| Rates ( $\mu\text{m}/\text{min}$ ) |                           |                       |                       |                      |                      |
| Growth                             | 1.87 $\pm$ 0.29 (59)      | 1.94 $\pm$ 0.28 (42)  | 2.89 $\pm$ 0.38 (57)  | 1.87 $\pm$ 0.36 (34) | 1.70 $\pm$ 0.19 (29) |
| Shrinkage                          | 40.65 $\pm$ 11.18 (23)    | 16.98 $\pm$ 4.38 (10) | *                     | 6.61 $\pm$ 1.12 (10) | 9.28 $\pm$ 3.80 (7)  |
| Frequencies ( $\text{min}^{-1}$ )  |                           |                       |                       |                      |                      |
| Catastrophe                        | 0.32 $\pm$ 0.06 (26)      | 0.09 $\pm$ 0.03 (10)  | <0.01 (0)             | 0.10 $\pm$ 0.04 (10) | 0.16 $\pm$ 0.06 (7)  |
| Rescue                             | <0.28 (0)                 | 0.77 $\pm$ 0.55 (2)   | *                     | 0.62 $\pm$ 0.27 (5)  | 1.41 $\pm$ 0.71 (4)  |
| Total time (min)                   |                           |                       |                       |                      |                      |
| Growth                             | 82.15                     | 106.8                 | 150.2                 | 104.1                | 45.05                |
| Shrinkage                          | 3.53                      | 2.58                  | 0                     | 8.12                 | 2.83                 |
| Total MT number                    | 89                        | 63                    | 106                   | 59                   | 33                   |
| <i>Minus Ends</i>                  |                           |                       |                       |                      |                      |
| MT length/axoneme                  |                           |                       |                       |                      |                      |
| MT number                          | 1.79 $\pm$ 1.06           | 5.12 $\pm$ 1.54       | 6.86 $\pm$ 1.12       | 4.60 $\pm$ 2.10      | 2.82 $\pm$ 0.87      |
| MT length                          | 2.46 $\pm$ 1.36 (24)      | 4.64 $\pm$ 0.95       | 7.76 $\pm$ 1.31 (24)  | 4.46 $\pm$ 1.45 (25) | 2.91 $\pm$ 0.79 (9)  |
| MT length/axonem                   | 4.40 $\pm$ 3.57           | 23.76 $\pm$ 8.64      | 53.23 $\pm$ 12.50     | 20.52 $\pm$ 11.50    | 8.21 $\pm$ 3.37      |
| Rates ( $\mu\text{m}/\text{min}$ ) |                           |                       |                       |                      |                      |
| Growth                             | 0.90 $\pm$ 0.21 (43)      | 1.02 $\pm$ 0.2 (33)   | 1.49 $\pm$ 0.20 (52)  | 0.93 $\pm$ 0.23 (35) | 0.82 $\pm$ 0.18 (23) |
| Shrinkage                          | 49.83 $\pm$ 11.58 (12)    | *                     | *                     | 6.63 $\pm$ 1.31 (3)  | 8.24 (1)             |
| Frequencies ( $\text{min}^{-1}$ )  |                           |                       |                       |                      |                      |
| Catastrophe                        | 0.27 $\pm$ 0.07 (15)      | <0.01 (0)             | <0.01 (0)             | 0.02 $\pm$ 0.01 (3)  | 0.02 (1)             |
| Rescue                             | 1.96 $\pm$ 1.39 (2)       | *                     | *                     | 0.95 $\pm$ 0.67 (2)  | 8.57 (1)             |
| Total time (min)                   |                           |                       |                       |                      |                      |
| Growth                             | 51.93                     | 92.90                 | 95.68                 | 138.2                | 49                   |
| Shrinkage                          | 1.17                      | 0                     | 0                     | 2.12                 | 0.12                 |
| Total MT number                    | 67                        | 61                    | 80                    | 60                   | 35                   |

Data are mean  $\pm$  SD. Values in parentheses are the number of events.

\* No catastrophe events were observed, so shrinkage rates and rescue frequencies could not be determined.
